# Supplementary material for: Ultrathin Stretchable All-Fiber Electronic Skin for Highly Sensitive Self-Powered Human Motion Monitoring
Source: MDPI journal article supplement (doi:10.3390/nanoenergyadv2010003), 2022-01-30
Supplement: s1 [file s1]

Archive with 1 entries (1 files):
- nanoenergyadv-1508508-supplementary.pdf
